# Supplementary material for: ONO-1301 loaded nanocomposite scaffolds modulate cAMP mediated signaling and induce new bone formation in critical sized bone defect
Source: Royal Society of Chemistry journal article supplement (doi:10.1039/c9bm01352k), 2019-12-11
Supplement: c9bm01352k1.pdf [file c9bm01352k1.pdf]

### Supplementary Data

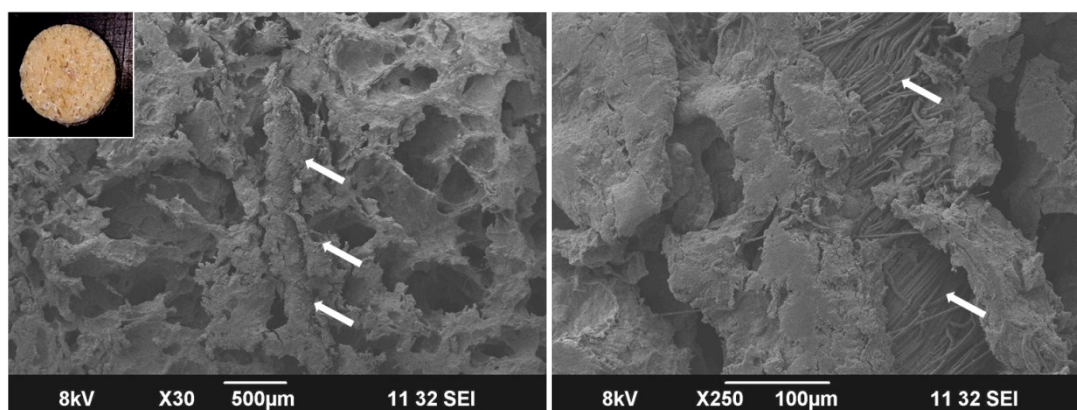

Figure S1. Scanning electron micrograph of nanocomposite fibrous scaffold under low (100x) and high magnification (1000x). White arrows: Nanofibers in the matrix. The photograph of the scaffold is given in the inset.

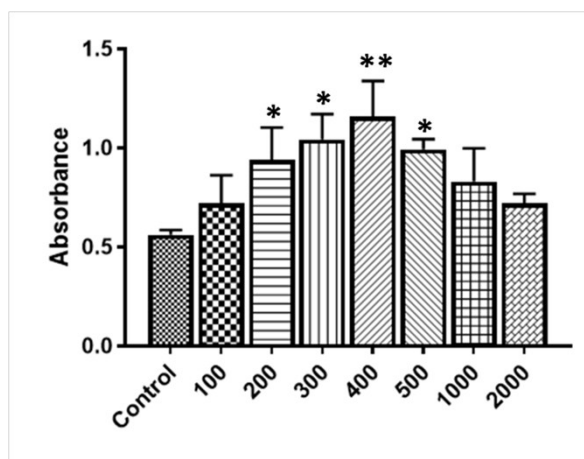

Figure S2. Cytotoxicity assay of MSCs treated with different concentrations of ONO-1301. ONO-1301 at certain concentration range could enhance cell viability in comparison to cells alone (\* -  $p < 0.05$  and \*\* -  $p < 0.001$ ).

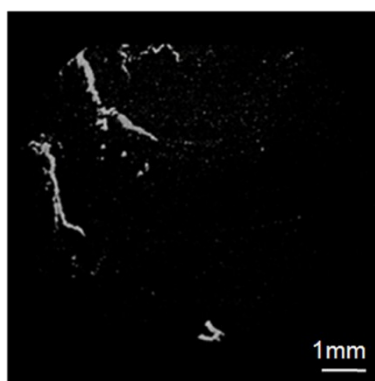

Figure S3. Representative micro-CT image showing vascularisation in the calvarial defect - Sham group.

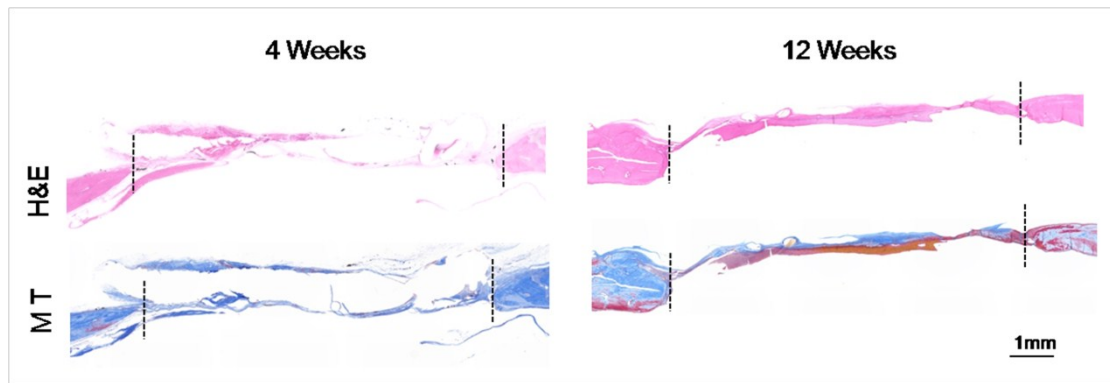

Figure S4. Histological analysis of tissue formation in sham group - Hematoxylin & Eosin (H&E) and Masson's Trichrome (MT) staining at 4 and 12 weeks. Adjacent sections of the same tissue in each group were stained with H&E and MT.
